# Supplementary material
Source: MDPI journal article supplement (https://www.mdpi.com/2410-3888/7/1/41)
Supplement: s1 [file s1]

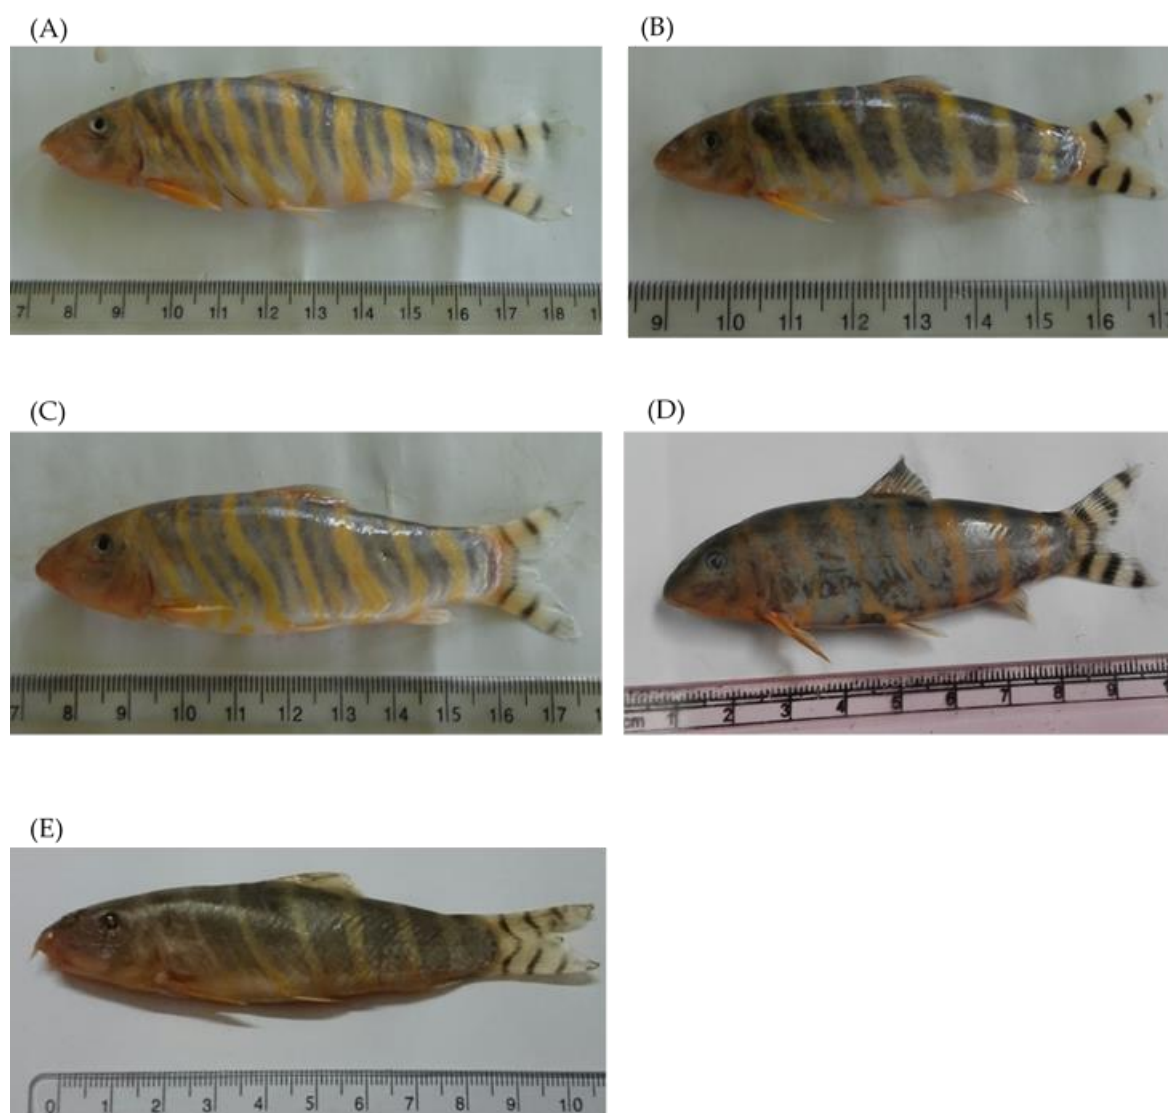

**Supplementary Figure S1.** General appearance of *Botia dario*. (A) Collected from Atrai River, AR; (B) collected from Dhorala River, DhR; (C) collected from Danu River, DR; (D) collected from Jamuna River, JR; and (E) collected from Padma River, PR. .

**Supplementary Table S1.** MANCOVA tests for effect of sampling sites, total length (TL) (covariate) and their interaction of body morphology of *Botia dario*.

| Effect | Wilk's Lambda | F      | Hypothesis df | Error df | <i>p</i> |
|--------|---------------|--------|---------------|----------|----------|
| TL     | 0.089         | 1.44E3 | 2             | 283      | 0.000*   |
| SS     | 0.979         | 3.082  | 2             | 283      | 0.047*   |
| SS*TL  | 0.793         | 8.716  | 8             | 566      | 0.000*   |

\*significant value ( $p < 0.05$ ), SS: Sampling sites

**Supplementary Table S2.** Univariate ANOVA of morphometric lengths and their ratios of *Botia dario* stocks collected from the five rivers of Bangladesh.

| Characteristics and ratios        | Wilks' Lambda | F      | df1 | df2 | p      |
|-----------------------------------|---------------|--------|-----|-----|--------|
| FL                                | 0.906         | 7.411  | 4   | 285 | 0.000* |
| SL                                | 0.897         | 8.205  | 4   | 285 | 0.000* |
| TrL                               | 0.946         | 4.056  | 4   | 285 | 0.003* |
| PrOL                              | 0.972         | 2.024  | 4   | 285 | 0.091  |
| PsOL                              | 0.793         | 18.620 | 4   | 285 | 0.000* |
| EL                                | 0.753         | 23.311 | 4   | 285 | 0.000* |
| UCL                               | 0.627         | 42.390 | 4   | 285 | 0.000* |
| LCL                               | 0.835         | 14.093 | 4   | 285 | 0.000* |
| TL_FL                             | 0.993         | 0.534  | 4   | 285 | 0.711  |
| TL_SL                             | 0.884         | 9.327  | 4   | 285 | 0.000* |
| TL_TrL                            | 0.931         | 5.250  | 4   | 285 | 0.000* |
| FL_SL                             | 0.928         | 5.491  | 4   | 285 | 0.000* |
| FL_TrL                            | 0.963         | 2.770  | 4   | 285 | 0.028* |
| SL_TrL                            | 0.958         | 3.137  | 4   | 285 | 0.015* |
| TrL_UCL                           | 0.726         | 26.897 | 4   | 285 | 0.000* |
| TrL_LCL                           | 0.817         | 15.971 | 4   | 285 | 0.000* |
| PrOL_PsOL                         | 0.639         | 40.275 | 4   | 285 | 0.000* |
| TL_UCL                            | 0.742         | 24.765 | 4   | 285 | 0.000* |
| TL_LCL                            | 0.856         | 12.028 | 4   | 285 | 0.000* |
| UCL_LCL                           | 0.884         | 9.347  | 4   | 285 | 0.000* |
| *significant value ( $p < 0.05$ ) |               |        |     |     |        |

**Supplementary Table S3.** Factors loading of different morphometric measurements and their ratios by using PCA among different stocks of *Botia dario* collected from the five rivers of Bangladesh.

| Characteristics | PC1           | PC2           | PC3    | PC4    | PC5    | PC6    |
|-----------------|---------------|---------------|--------|--------|--------|--------|
| FL              | <b>0.503</b>  | <b>0.722</b>  | 0.222  | 0.268  | 0.076  | 0.277  |
| SL              | <b>0.637</b>  | <b>0.659</b>  | 0.263  | 0.250  | 0.044  | -0.096 |
| TrL             | <b>0.905</b>  | <b>0.344</b>  | -0.065 | -0.181 | -0.112 | 0.081  |
| PsOL            | -0.034        | <b>0.399</b>  | -0.017 | 0.322  | 0.244  | 0.079  |
| EL              | -0.089        | 0.207         | 0.468  | -0.018 | -0.209 | -0.451 |
| UCL             | -0.260        | <b>0.485</b>  | 0.291  | -0.654 | 0.424  | -0.011 |
| LCL             | -0.207        | <b>0.803</b>  | -0.520 | -0.128 | 0.040  | -0.113 |
| TL_SL           | <b>-0.620</b> | <b>-0.675</b> | -0.266 | -0.242 | -0.060 | 0.094  |
| TL_TrL          | <b>-0.902</b> | <b>-0.376</b> | 0.048  | 0.164  | 0.081  | -0.073 |
| FL_SL           | -0.311        | 0.137         | -0.096 | 0.039  | 0.071  | 0.857  |
| FL_TrL          | <b>-0.684</b> | 0.288         | 0.308  | 0.500  | 0.205  | 0.196  |
| SL_TrL          | <b>-0.607</b> | 0.251         | 0.395  | 0.540  | 0.193  | -0.225 |
| TrL_UCL         | <b>0.783</b>  | <b>-0.442</b> | -0.109 | 0.158  | 0.370  | -0.022 |
| TrL_LCL         | <b>0.739</b>  | <b>-0.485</b> | 0.417  | 0.017  | -0.127 | 0.152  |
| PrOL_PsOL       | 0.011         | -0.034        | -0.257 | 0.529  | -0.804 | 0.042  |
| TL_UCL          | <b>0.372</b>  | <b>-0.741</b> | -0.137 | 0.365  | 0.371  | -0.069 |
| TL_LCL          | 0.188         | <b>-0.781</b> | 0.567  | 0.010  | 0.127  | 0.103  |
| UCL_LCL         | -0.251        | 0.035         | 0.741  | -0.331 | -0.437 | 0.192  |

The first four principal components are shown here. The most important morphometric variables and ratios contributed to the PC1 and PC2 are marked as bold face.

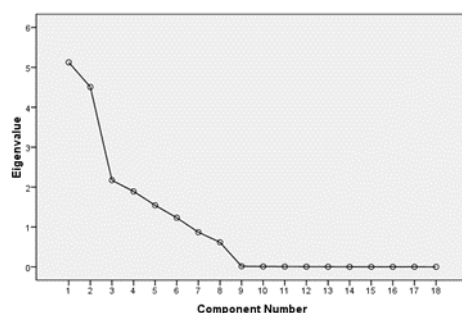

**Supplementary Figure S2.** Wilk's lambda test for verifying differences among stocks of *Botia dario* with morphometric measurements and ratios, using canonical variate analysis (CVA).

**Supplementary Table S4.** Wilk's lambda test for verifying differences among stocks of *Botia dario* with morphometric measurements and ratios, using canonical variate analysis (CVA).

| Test of Function(s) | Wilks' Lambda | Chi-square | df | p      |
|---------------------|---------------|------------|----|--------|
| 1 through 4         | 0.145         | 537.603    | 64 | 0.000* |
| 2 through 4         | 0.351         | 291.742    | 45 | 0.000* |
| 3 through 4         | 0.616         | 135.001    | 28 | 0.000* |
| 4                   | 0.879         | 36.072     | 13 | 0.001* |

\*significant value ( $p < 0.05$ )

**Supplementary Table S5.** Contribution of morphometric measurements and ratios to the canonical variate scores in *Botia dario* collected from five rivers in Bangladesh.

| Characteristics       | CV1     | CV2     | CV3     | CV4     |
|-----------------------|---------|---------|---------|---------|
| FL                    | -0.251* | 0.121   | 0.091   | -0.028  |
| TL_SL                 | 0.244*  | -0.179  | -0.212  | -0.156  |
| UCL                   | -0.244  | 0.820*  | 0.019   | -0.109  |
| TL_UCL                | -0.184  | -0.577* | 0.335   | 0.059   |
| PrOL_PsOL             | 0.488   | -0.489* | -0.322  | 0.136   |
| EL                    | 0.318   | 0.435*  | 0.307   | -0.052  |
| PsOL                  | -0.307  | 0.085   | -0.520* | 0.228   |
| TrL_UCL               | -0.317  | -0.436  | 0.464*  | 0.001   |
| TrL_LCL               | -0.089  | -0.372  | 0.459*  | 0.366   |
| TL_TrL                | 0.185   | -0.018  | -0.236* | 0.093   |
| TrL                   | -0.150  | -0.008  | 0.236*  | -0.095  |
| FL_TrL                | -0.036  | 0.126   | -0.235* | 0.105   |
| SL                    | -0.223  | 0.158   | 0.232*  | 0.154   |
| LCL                   | 0.004   | 0.398   | -0.335  | -0.466* |
| UCL_LCL               | 0.192   | 0.263   | -0.041  | 0.433*  |
| TL_LCL                | -0.078  | -0.305  | 0.393   | 0.418*  |
| FL_SL                 | -0.062  | -0.085  | -0.315  | -0.407* |
| FL_TrL                | -0.007  | 0.185   | -0.104  | 0.327*  |
| Eigenvalues           | 1.418   | 0.756   | 0.426   | 0.138   |
| % of Variance         | 51.8    | 27.6    | 15.6    | 5.1     |
| Cumulative %          | 51.8    | 79.4    | 94.9    | 100.0   |
| Canonical Correlation | 0.766   | 0.656   | 0.547   | 0.349   |

Variables ordered by absolute size of correlation within function. \* Largest absolute correlation between each variable and any canonical variates.

**Supplementary Table S6.** Classification of *Botia dario* into their original stocks using classification matrix (original and cross-validated) of the CVA based on morphometric measurements and ratios.

| Stock Name                          | Danu River        | Padma River       | Jamuna River      | Dhorola River     | Atrai River       | Total       |
|-------------------------------------|-------------------|-------------------|-------------------|-------------------|-------------------|-------------|
| <b>Original <sup>a</sup></b>        |                   |                   |                   |                   |                   |             |
| Danu River                          | <b>39 (65.0%)</b> | 8 (13.3%)         | 6 (10.0%)         | 2 (3.3%)          | 5 (8.3%)          | 60 (100.0%) |
| Padma River                         | 12 (5.0%)         | <b>21 (42.0%)</b> | 6 (12.0%)         | 9 (18.0%)         | 2 (4.0%)          | 50 (100.0%) |
| Jamuna River                        | 5 (9.4%)          | 3 (5.7%)          | <b>34 (64.2%)</b> | 3 (5.7%)          | 8 (15.1%)         | 53 (100.0%) |
| Dhorola River                       | 0                 | 5 (8.9%)          | 0                 | <b>50 (89.3%)</b> | 1 (1.8%)          | 56 (100.0%) |
| Atrai River                         | 4 (5.6%)          | 4 (5.6%)          | 6 (8.5%)          | 2 (2.8%)          | <b>55 (77.5%)</b> | 71 (100.0%) |
| <b>Cross-validated <sup>b</sup></b> |                   |                   |                   |                   |                   |             |
| Danu River                          | <b>36 (60.0%)</b> | 11 (18.3%)        | 6 (10.0)          | 2 (3.3)           | 5 (8.3)           | 60 (100.0%) |
| Padma River                         | 14 (28.0%)        | <b>15 (30.0%)</b> | 7 (14.0)          | 12 (24.0)         | 2 (4.0)           | 50 (100.0%) |
| Jamuna River                        | 7 (13.2%)         | 3 (5.7%)          | <b>30 (56.6)</b>  | 5 (9.4)           | 8 (15.1)          | 53 (100.0%) |
| Dhorola River                       | 0                 | 5 (8.9%)          | 3 (5.4)           | <b>46 (82.1)</b>  | 2 (3.6)           | 56 (100.0%) |
| Atrai River                         | 4 (5.6%)          | 4 (5.6%)          | 7 (9.9)           | 2 (2.8)           | <b>54 (76.1)</b>  | 71 (100.0%) |

<sup>a</sup> 68.6% of original grouped cases correctly classified<sup>b</sup> 62.4% of cross-validated grouped cases correctly classified

Percentages of correct classification is written in bold and corresponding number of individuals are marked in parentheses

**Supplementary Table S7.** Univariate ANOVA of morphometric lengths and their ratios of *Botia dario* stocks collected from the five rivers of Bangladesh.

| Characteristics                   | Wilks' Lambda | F       | df1 | df2 | p      |
|-----------------------------------|---------------|---------|-----|-----|--------|
| 1_2                               | 0.689         | 32.228  | 4   | 285 | 0.000* |
| 2_3                               | 0.714         | 28.599  | 4   | 285 | 0.000* |
| 3_4                               | 0.857         | 11.915  | 4   | 285 | 0.000* |
| 4_5                               | 0.852         | 12.360  | 4   | 285 | 0.000* |
| 5_6                               | 0.858         | 11.773  | 4   | 285 | 0.000* |
| 6_7                               | 0.954         | 3.412   | 4   | 285 | 0.010* |
| 7_8                               | 0.837         | 13.880  | 4   | 285 | 0.000* |
| 8_9                               | 0.952         | 3.614   | 4   | 285 | 0.007* |
| 9_10                              | 0.880         | 9.740   | 4   | 285 | 0.000* |
| 10_11                             | 0.855         | 12.094  | 4   | 285 | 0.000* |
| 11_12                             | 0.791         | 18.829  | 4   | 285 | 0.000* |
| 12_1                              | 0.712         | 28.865  | 4   | 285 | 0.000* |
| 2_12                              | 0.701         | 30.419  | 4   | 285 | 0.000* |
| 2_11                              | 0.297         | 168.786 | 4   | 285 | 0.000* |
| 2_10                              | 0.869         | 10.776  | 4   | 285 | 0.000* |
| 2_9                               | 0.917         | 6.488   | 4   | 285 | 0.000* |
| 2_8                               | 0.890         | 8.851   | 4   | 285 | 0.000* |
| 5_7                               | 0.976         | 1.725   | 4   | 285 | 0.144  |
| 3_11                              | 0.754         | 23.184  | 4   | 285 | 0.000* |
| 3_10                              | 0.983         | 1.204   | 4   | 285 | 0.309  |
| 5_8                               | 0.791         | 18.835  | 4   | 285 | 0.000* |
| 4_10                              | 0.648         | 38.680  | 4   | 285 | 0.000* |
| 4_8                               | 0.908         | 7.203   | 4   | 285 | 0.000* |
| *significant value ( $p < 0.05$ ) |               |         |     |     |        |

**Supplementary Table S8.** Factors loading of truss measurements using PCA among different stocks of *Botia dario* collected from the five rivers of Bangladesh.

| Truss measurements | PC1          | PC2           | PC3    | PC4    | PC5    | PC6    | PC7    |
|--------------------|--------------|---------------|--------|--------|--------|--------|--------|
| 1_2                | 0.170        | <b>0.408</b>  | 0.548  | 0.220  | -0.610 | -0.156 | -0.016 |
| 2_3                | 0.272        | 0.121         | 0.452  | 0.416  | -0.667 | -0.054 | -0.122 |
| 3_4                | 0.195        | <b>0.632</b>  | -0.087 | 0.189  | 0.320  | -0.169 | -0.233 |
| 4_5                | <b>0.434</b> | <b>-0.627</b> | 0.159  | 0.005  | -0.098 | 0.257  | 0.260  |
| 5_6                | 0.351        | 0.372         | 0.278  | -0.008 | 0.353  | -0.286 | 0.094  |
| 6_7                | <b>0.416</b> | -0.113        | 0.043  | 0.148  | 0.293  | -0.489 | 0.346  |
| 7_8                | -0.058       | -0.378        | 0.589  | 0.274  | 0.349  | 0.148  | -0.258 |
| 8_9                | 0.109        | 0.239         | 0.285  | -0.014 | 0.121  | 0.387  | 0.473  |
| 9_10               | <b>0.551</b> | -0.068        | -0.061 | -0.494 | -0.088 | -0.270 | -0.151 |
| 10_11              | <b>0.586</b> | <b>-0.439</b> | -0.031 | 0.065  | -0.043 | -0.152 | -0.175 |
| 11_12              | -0.304       | 0.109         | -0.168 | 0.709  | 0.145  | -0.016 | 0.205  |
| 12_1               | 0.310        | <b>0.529</b>  | 0.220  | -0.183 | 0.053  | -0.233 | 0.270  |
| 2_12               | <b>0.627</b> | <b>0.428</b>  | 0.213  | -0.219 | 0.086  | 0.220  | 0.050  |
| 2_11               | 0.314        | <b>0.500</b>  | -0.436 | 0.362  | -0.020 | 0.345  | 0.074  |
| 2_10               | <b>0.544</b> | -0.128        | -0.351 | 0.564  | 0.023  | 0.001  | -0.045 |
| 2_9                | <b>0.792</b> | -0.166        | -0.318 | 0.095  | -0.072 | -0.188 | -0.080 |
| 2_8                | <b>0.859</b> | -0.175        | -0.187 | 0.139  | -0.033 | -0.074 | 0.092  |
| 3_11               | <b>0.788</b> | 0.063         | -0.069 | -0.100 | -0.064 | 0.283  | -0.245 |
| 5_8                | 0.334        | -0.311        | 0.585  | 0.229  | 0.483  | 0.049  | -0.144 |
| 4_10               | <b>0.663</b> | 0.369         | 0.012  | -0.158 | 0.196  | 0.302  | -0.254 |
| 4_8                | <b>0.618</b> | -0.301        | 0.017  | -0.153 | -0.142 | 0.106  | 0.411  |

The first four principal components are shown here. The most important morphometric variables and ratios contributed to the PC1 and PC2 are marked as bold face.

The most important morphometric variables and ratios contributed to the PC1 and PC2 are marked as bold face.

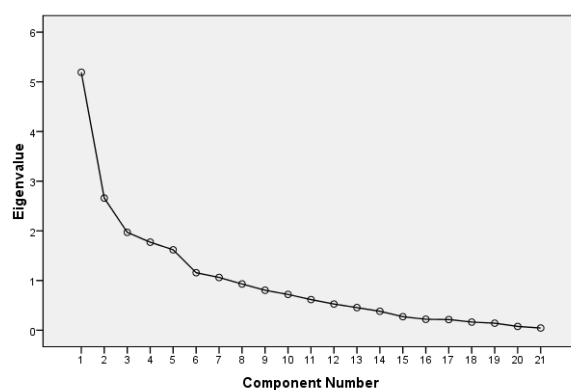

**Supplementary Figure S3.** Wilk's lambda test for verifying differences among stocks of *Botia dario* with truss measurements using canonical variate analysis (CVA).

**Supplementary Table S9.** Wilk's lambda test for verifying differences among stocks of *Botia dario* with truss measurements using canonical variate analysis (CVA).

| Test of Function(s)               | Wilks' Lambda | Chi-square | df | p      |
|-----------------------------------|---------------|------------|----|--------|
| 1 through 4                       | 0.019         | 1089.025   | 84 | 0.000* |
| 2 through 4                       | 0.134         | 554.061    | 60 | 0.000* |
| 3 through 4                       | 0.377         | 269.366    | 38 | 0.000* |
| 4                                 | 0.713         | 93.371     | 18 | 0.000* |
| *significant value ( $p < 0.05$ ) |               |            |    |        |

**Supplementary Table S10.** Contribution of truss measurements to the canonical variate scores in *Botia dario* collected from five rivers in Bangladesh.

| Truss measurements                                                                 | CV1                | CV2                | CV3                | CV4                |
|------------------------------------------------------------------------------------|--------------------|--------------------|--------------------|--------------------|
| 2_11                                                                               | -0.622*            | 0.026              | 0.239              | -0.210             |
| 7_8                                                                                | 0.179*             | -0.050             | 0.009              | -0.002             |
| 6_7                                                                                | 0.086*             | -0.010             | 0.059              | 0.033              |
| 4_10                                                                               | -0.163             | 0.446*             | 0.147              | -0.114             |
| 2_12                                                                               | -0.106             | 0.444*             | 0.007              | 0.099              |
| 1_2                                                                                | 0.024              | 0.434*             | 0.199              | 0.428              |
| 2_3                                                                                | 0.042              | 0.397*             | 0.342              | 0.081              |
| 11_12                                                                              | -0.032             | -0.362*            | 0.153              | 0.024              |
| 3_11                                                                               | -0.102             | 0.319*             | 0.297              | -0.017             |
| 12_1                                                                               | -0.067             | 0.310              | -0.476*            | 0.083              |
| 4_5                                                                                | 0.085              | 0.056              | 0.365*             | -0.119             |
| 5_6                                                                                | -0.014             | 0.227              | -0.277*            | -0.084             |
| 2_8                                                                                | 0.013              | 0.182              | 0.224*             | -0.217             |
| 4_8                                                                                | 0.043              | 0.153              | 0.221*             | -0.099             |
| 3_4                                                                                | -0.115             | 0.156              | -0.219*            | 0.060              |
| 2_10                                                                               | -0.043             | 0.051              | 0.257              | -0.437*            |
| 9_10                                                                               | 0.045              | 0.218              | 0.016              | 0.309*             |
| 8_9                                                                                | -0.039             | 0.055              | -0.022             | 0.297*             |
| 5_8                                                                                | 0.179              | 0.106              | 0.167              | -0.262*            |
| 2_9                                                                                | -0.015             | 0.161              | 0.170              | -0.205*            |
| 10_11                                                                              | 0.140              | 0.083              | 0.174              | -0.186*            |
| Eigenvalue                                                                         | 5.947 <sup>a</sup> | 1.805 <sup>a</sup> | 0.892 <sup>a</sup> | 0.403 <sup>a</sup> |
| % of Variance                                                                      | 65.7               | 20.0               | 9.9                | 4.4                |
| Cumulative %                                                                       | 65.7               | 85.7               | 95.6               | 100.0              |
| Canonical Correlation                                                              | 0.925              | 0.802              | 0.687              | 0.536              |
| * Largest absolute correlation between each variable and any discriminant function |                    |                    |                    |                    |

**Supplementary Table S11.** Classification of *Botia dario* into their original stocks using classification matrix (original and cross-validated) of the CVA based on truss measurements.

| Stocks Name                  | Danu River        | Padma River       | Jamuna River      | Dhorola River     | Atrai River       | Total       |
|------------------------------|-------------------|-------------------|-------------------|-------------------|-------------------|-------------|
| Original <sup>a</sup>        |                   |                   |                   |                   |                   |             |
| Danu River                   | <b>54 (90.0%)</b> | 1 (1.7%)          | 4 (6.7%)          | 1 (1.7%)          | 0                 | 60 (100.0%) |
| Padma River                  | 4 (8.0%)          | <b>40 (80.0%)</b> | 4 (8.0%)          | 2 (4.0%)          | 0                 | 50 (100.0%) |
| Jamuna River                 | 6 (11.3%)         | 6 (11.3%)         | <b>41 (77.4%)</b> | 0                 | 0                 | 53 (100.0%) |
| Dhorola River                | 1 (1.8%)          | 1 (1.8%)          | 1 (1.8%)          | <b>53 (94.6%)</b> | 0                 | 56 (100.0%) |
| Atrai River                  | 1 (1.4%)          | 0                 | 0                 | 0                 | <b>70 (98.6%)</b> | 71 (100.0%) |
| Cross-validated <sup>b</sup> |                   |                   |                   |                   |                   |             |
| Danu River                   | <b>52 (86.7%)</b> | 1 (1.7%)          | 5 (8.3%)          | 2 (3.3%)          | 0                 | 60 (100.0%) |
| Padma River                  | 7 (14.0%)         | <b>37 (74.0%)</b> | 4 (8.0%)          | 2 (4.0%)          | 0                 | 50 (100.0%) |
| Jamuna River                 | 8 (15.1%)         | 6 (11.3%)         | <b>38 (71.7%)</b> | 1 (1.9%)          | 0                 | 53 (100.0%) |
| Dhorola River                | 1 (1.8%)          | 1 (1.8%)          | 2 (3.6%)          | <b>52 (92.9%)</b> | 0                 | 56 (100.0%) |
| Atrai River                  | 1 (1.4%)          | 0                 | 0                 | 0                 | <b>70 (98.6%)</b> | 71 (100.0%) |

<sup>a</sup> 89.0% of original grouped cases correctly classified  
<sup>b</sup> 85.9% of cross-validated grouped cases correctly classified  
Percentages of correct classification is written in bold and corresponding number of individuals are marked in parentheses
